# Supplementary material for: Synergic improvements in flame retardant and dielectric properties of hybrid epoxy resin composites bearing a dimethyl methylphosphonate-loaded zeolitic imidazole framework
Source: Royal Society of Chemistry journal article supplement (doi:10.1039/d3nj04806c), 2024-01-01
Supplement: d3nj04806c1.pdf [file d3nj04806c1.pdf]

## Supporting Information (SI)

### **Synergic Improvement in Flame Retardant and Dielectric Properties of Hybrid Epoxy Resin Composites Bearing Dimethyl Methylphosphonate-Loaded Zeolitic Imidazole Framework**

Huiru Guan,<sup>a</sup> Ting Shu Liu,<sup>a</sup> Lifeng Shi,<sup>a</sup> Liwei Ma,<sup>a</sup> Alexander M. Kirillov,<sup>b</sup>  
Weisheng Liu,<sup>a</sup> Lizi Yang,<sup>\*a</sup> Wei Dou <sup>\*a</sup>

<sup>a</sup>State Key Laboratory of Applied Organic Chemistry and Key Laboratory of Nonferrous Metals Chemistry and Resources Utilization of Gansu Province, College of Chemistry and Chemical Engineering, Lanzhou University, Lanzhou 730000, P. R. China;

<sup>b</sup>Centro de Química Estrutural, Institute of Molecular Sciences, Departamento de Engenharia Química, Instituto Superior Técnico, Universidade de Lisboa, Av. Rovisco Pais, 1049-001, Lisbon, Portugal.

Corresponding author: yanglz@lzu.edu.cn, douwei@lzu.edu.cn

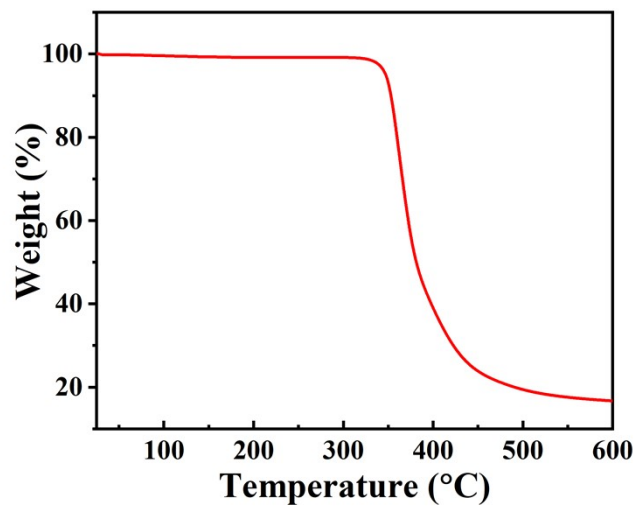

**Figure S1.** TG curve of EP.

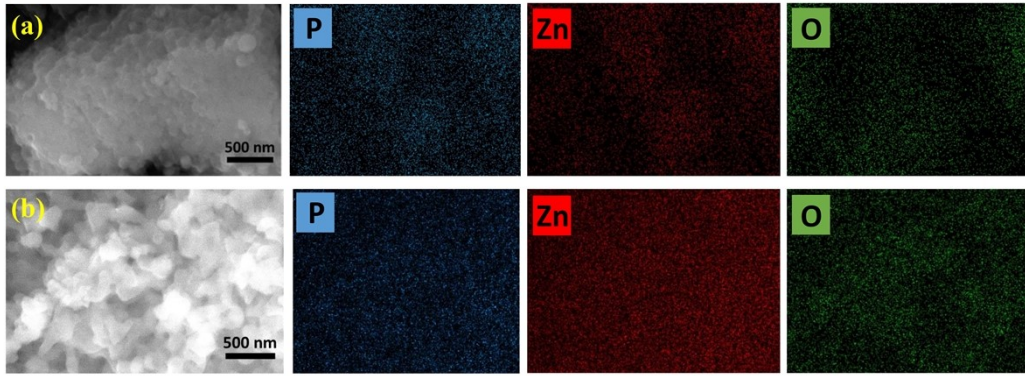

**Figure S2.** SEM images of (a) ZIF-8@DMMP and (b) ZIF-8@DMMP after 30 min in oven at 250 °C; the corresponding elemental mapping is also indicated at the right side (P: light blue, Zn: red, O: green).

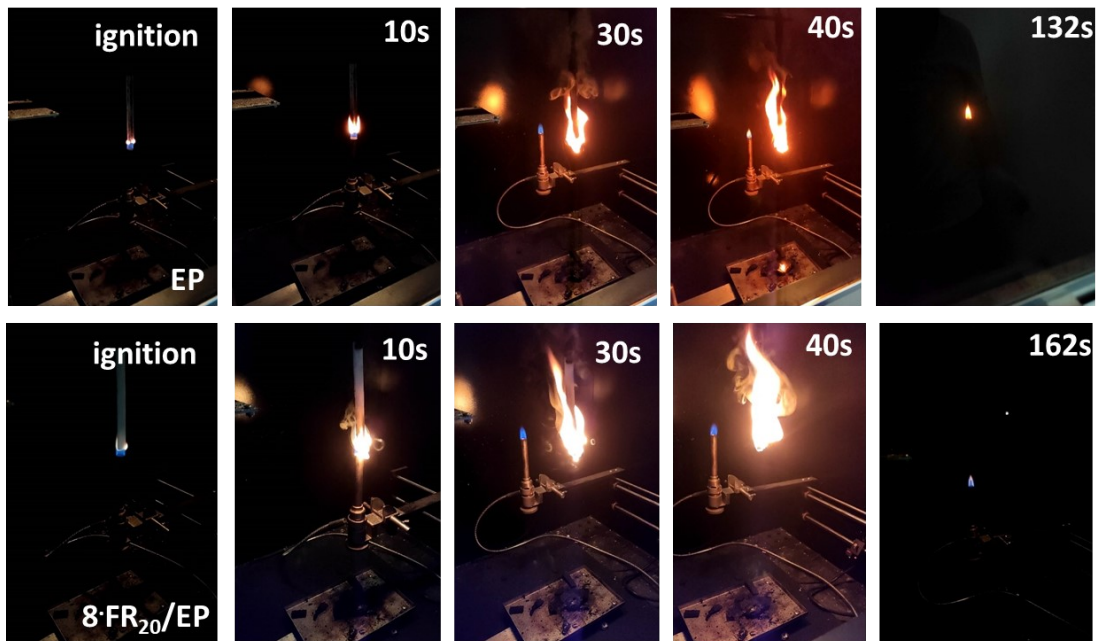

**Figure S3.** The combustion process of EP and 8·FR<sub>20</sub>/EP during the UL-94 testing.

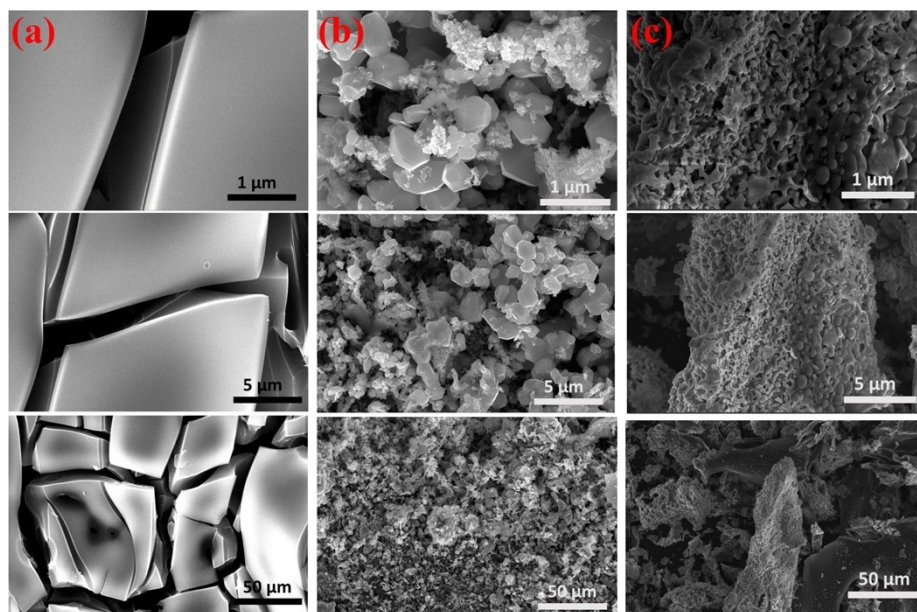

**Figure S4.** SEM images of char residue from (a) EP, (b) 8<sub>20</sub>/EP, and (c) 8-FR<sub>20</sub>/EP.

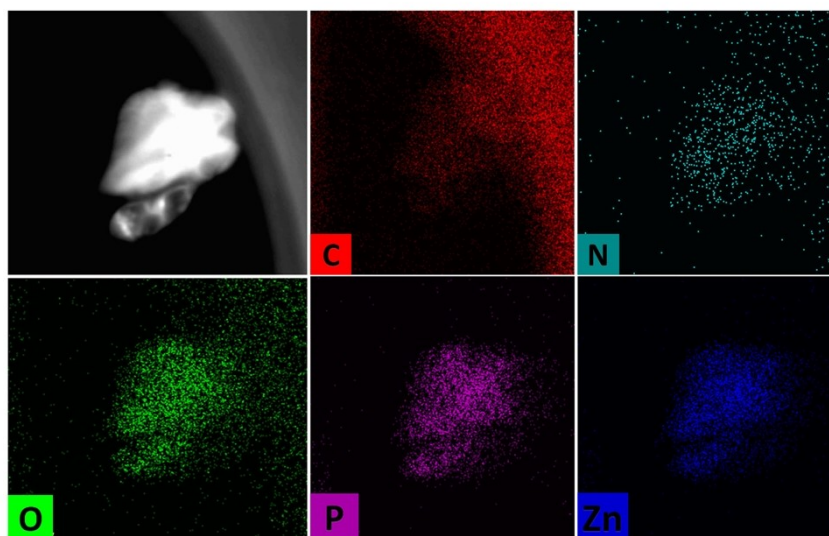

**Figure S5.** Elemental mapping of char residue from 8-FR<sub>20</sub>/EP.

**Table S1.** Summary of Cone Calorimetry Results and Smoke Density Data for EP and Derived Composites.

| Sample                 | pHRR<br>(kW/m <sup>2</sup> ) | THR at<br>400 s<br>(MJ/m <sup>2</sup> ) | TSP<br>at<br>400 s<br>(m <sup>2</sup> ) | COP <sub>max</sub><br>(g/s) | CO <sub>2</sub> P <sub>max</sub><br>(g/s) | SPR <sub>max</sub><br>(m <sup>2</sup> /s) | Residue<br>(%) | D <sub>s,max</sub> |
|------------------------|------------------------------|-----------------------------------------|-----------------------------------------|-----------------------------|-------------------------------------------|-------------------------------------------|----------------|--------------------|
| EP                     | 1327                         | 94                                      | 21                                      | 0.49                        | 1.28                                      | 0.25                                      | 4.3            | 836.2              |
| 8 <sub>20</sub> /EP    | 750                          | 84                                      | 19                                      | 0.16                        | 0.61                                      | 0.21                                      | 17.9           | 629.4              |
| 8-FR <sub>20</sub> /EP | 723                          | 76                                      | 16                                      | 0.18                        | 0.53                                      | 0.18                                      | 16.1           | 589.5              |

**Table S2** Dependence of dielectric constant and dielectric loss for previously reported EP nanocomposites.

| Matrix composition           | Dielectric constant              | Frequency (Hz)                                                               | Dielectric loss                          | Ref       |
|------------------------------|----------------------------------|------------------------------------------------------------------------------|------------------------------------------|-----------|
| 20 wt. % EP/HGM5             | 2.59                             | 10 <sup>2</sup> –10 <sup>6</sup>                                             | 0.0145                                   | 1         |
| EP/N-PPSQ composites         | 3.15                             | 10 <sup>2</sup> –10 <sup>6</sup>                                             | 0.026                                    | 2         |
| ]DCPD/DPO-HQ-AE-0.9/EP       | 2.67                             | 10 <sup>5</sup> –10 <sup>9</sup>                                             | 0.0045                                   | 3         |
| EP/ Fe@POSS–COOH             | 3.51                             | 10 <sup>3</sup> –10 <sup>6</sup>                                             | not given                                | 4         |
| EP/MAP 1 wt. %               | 2.9                              | 10 <sup>3</sup> –10 <sup>7</sup>                                             | 0.04                                     | 5         |
| HCA-EP/MeHHPA                | 6.16                             | 10 <sup>3</sup> –10 <sup>7</sup>                                             | 0.033                                    | 6         |
| BAPT-EP/MHHPA                | 3.24-3.27                        | 10 <sup>6</sup> –10 <sup>8</sup>                                             | 0.16                                     | 7         |
| 7 wt% EP/preFPBO in CE       | 2.48                             | 10 <sup>5</sup> –10 <sup>7</sup>                                             | 0.01                                     | 8         |
| CE-EP/prePBO                 | 2.4                              | 10 <sup>5</sup> –10 <sup>6</sup>                                             | 0.007                                    | 9         |
| <b>EP/ZIF@DMMP(20 wt. %)</b> | <b>3.6~3.1</b><br><b>3.0~2.7</b> | <b>10<sup>6</sup>–10<sup>9</sup></b><br><b>10<sup>8</sup>–10<sup>9</sup></b> | <b>0.025-0.031</b><br><b>0.028-0.032</b> | This work |

1. X. Zhang, M. Liu, Y. Chen, J. He, X. Wang, J. Xie, Z. Li, Z. Chen, Y. Fu, C. Xiong and S. Wang, Epoxy resin/hollow glass microspheres composite materials with low dielectric constant and excellent mechanical performance, *J. Appl. Polym. Sci.* 2022, **139**, e52787.
2. Junchen Bai, Haijun Fan, Qining Ke, Fushuai Luo, Juan Chen, Liu Peng, Yanfen Ding, Jiacheng Zhang, Ge Zhang, Mingshu Yangb, High performance epoxy composites modified by a ladder-like polysilsesquioxane, *Composites Communications*, 46 (2024) 101813
3. Z. Fu, Z. Ma, J. Liu, C. Li, C. Liu, Q. Wang, L. Song, Q. Yu, G. Cheng, Y. Han, H. Liu, Z. Wang, Phosphorus-containing active esters modified dicyclopentadiene epoxy resins with simultaneously improved flame retardancy, thermal stability, and dielectric properties, *Chemical Engineering Journal* (2024), doi: <https://doi.org/10.1016/j.cej.2024.148998>
4. Wenyuan Zhang, Wenchao Zhang, Ye-Tang Pan, Rongjie Yang, Facile synthesis of transition metal containing polyhedral oligomeric silsesquioxane complexes with mesoporous structures and

their applications in reducing fire hazards, enhancing mechanical and dielectric properties of epoxy composites , *Journal of Hazardous Materials*, 401 (2021) 123439

5. Peifan Qin, Deqi Yi, Jianwei Hao, Xinming Ye, Ming Gao, Tinglu Song , Fabrication of melamine trimetaphosphate 2D supermolecule and its superior performance on flame retardancy, mechanical and dielectric properties of epoxy resin, *Composites Part B* 225 (2021) 109269,

6. Zhimin Wang, Xiangkai Zhang, Jiajin Cai, Jianqiang Xie, Plant-derived p-hydroxyphenylacrylic acid-derived epoxy resins exhibit excellent flame retardancy, hydrophobicity, degradability, and low dielectric loss after curing with bio-based fluorinated Schiff bases, *Polymer Degradation and Stability* 209 (2023) 110270

7. Xing Liu, Zhenhong Xiao, Xianyong Liu, Yuling Liu, Jianqing Zhao, Shumei Liu, Design and synthesis of epoxy prepolymer containing aromatic imide structures for thermoset with excellent thermal, mechanical and dielectric properties *Chemical Engineering Science*, 281 (2023) 119149

8. Yadong Wang , Li Ma , Jun Yuan , Zongmin Zhu, Xiaoming Liu , Dengsong Li, Liqing He , Fei Xiao, Furfural-based P/N/S flame retardant towards high-performance epoxy resins with flame retardancy, toughness, low dielectric properties and UV resistance, *Polymer Degradation and Stability*, 212 (2023) 110343

8. Zheng Liu, Junliang Zhang, Lin Tang, Yuxiao Zhou, Yuhan Lin, Ruting Wang, Jie Kong, Yusheng Tang, Junwei Gu, Improved wave-transparent performances and enhanced mechanical properties for fluoride-containing PBO precursor modified cyanate ester resins and their PBO fibers/cyanate ester composites. *Composites Part B: Engineering*, 178 (2019) 107466.

9. Junwei Gu, Wencai Dong, Shuang Xu, Yusheng Tang, Lin Ye, Jie Kong, Development of wave-transparent, light-weight composites combined with superior dielectric performance and desirable thermal stabilities. *Composites Science and Technology*, 144 (2017) 185-192.
